# Supplementary material for: The Role of Sulfuric Acid, Abiotic–Organic Acids, and Biotic Acids on Serpentinite Dissolution and Trace Metal Release
Source: MDPI journal article supplement (doi:10.3390/min14030256), 2024-02-28
Supplement: s1 [file s1]

## Supplementary Materials

# The role of sulfuric acid, abiotic-organic acids, and biotic acids on serpentinite dissolution and trace metal release

Agnes R. Taylor<sup>1</sup>, Amanda Albright Olsen<sup>1\*</sup>, Elisabeth M. Hausrath<sup>2</sup>, Brian J. Olsen<sup>3</sup> and Dawn Cardace<sup>4</sup>

<sup>1</sup> School of Earth and Climate Science, Uni University of Maine, Orono, ME, USA 04469

<sup>2</sup> Department of Geoscience, University of Nevada, Las Vegas, Las Vegas, NV 89154

<sup>3</sup> School of Biology and Ecology, University of Maine, Orono, ME, USA 04469

<sup>4</sup> Department of Geosciences, University of Rhode Island, Kingston, RI 02881

\* Correspondence: amanda.a.olsen@maine.edu; Tel.:1-207-581-2194

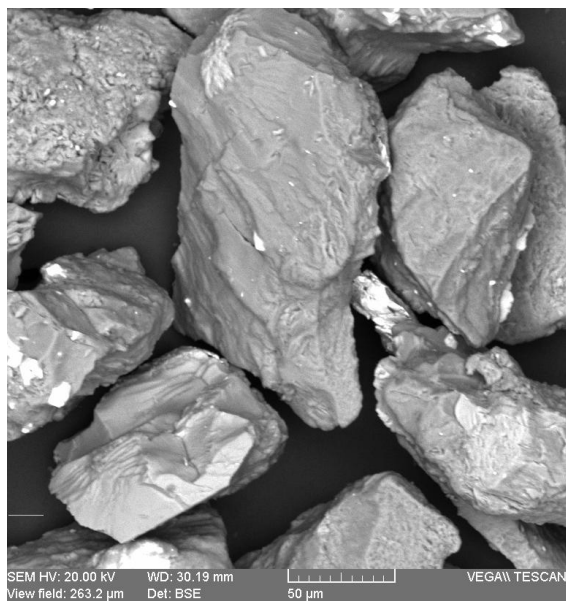

**Supplementary Figure S1.** Photomicrographs of unreacted serpentinite rock grains illustrating the degree of inclusions in the grains.

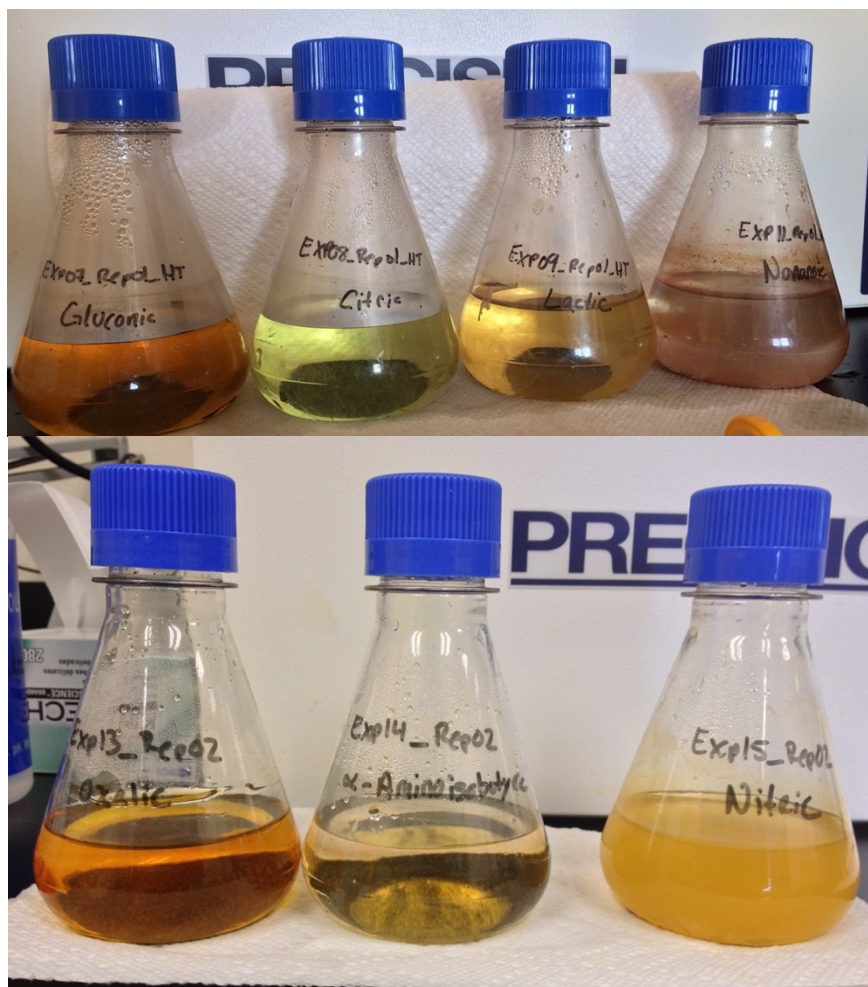

**Supplementary Figure S2.** Photographs of the dissolution experiments. Top photograph displays the color variation between different experiments while the bottom shows the difference in clarity.

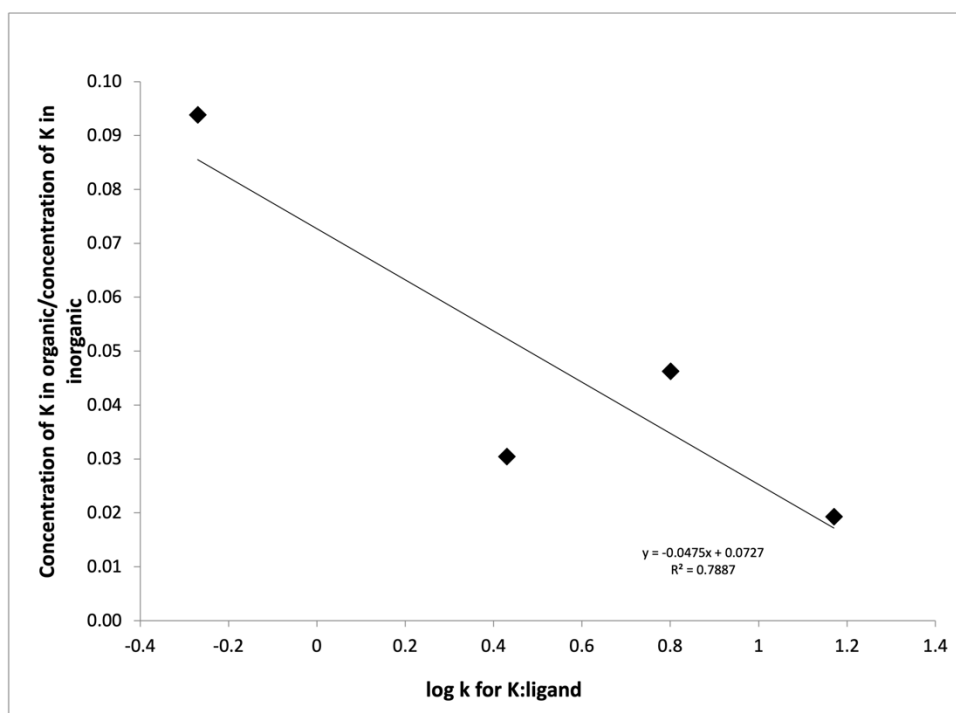

**Supplementary Figure S3.** Release ratios for K in organic solutions and nitric acid versus stability constant for the metal-ligand pair.

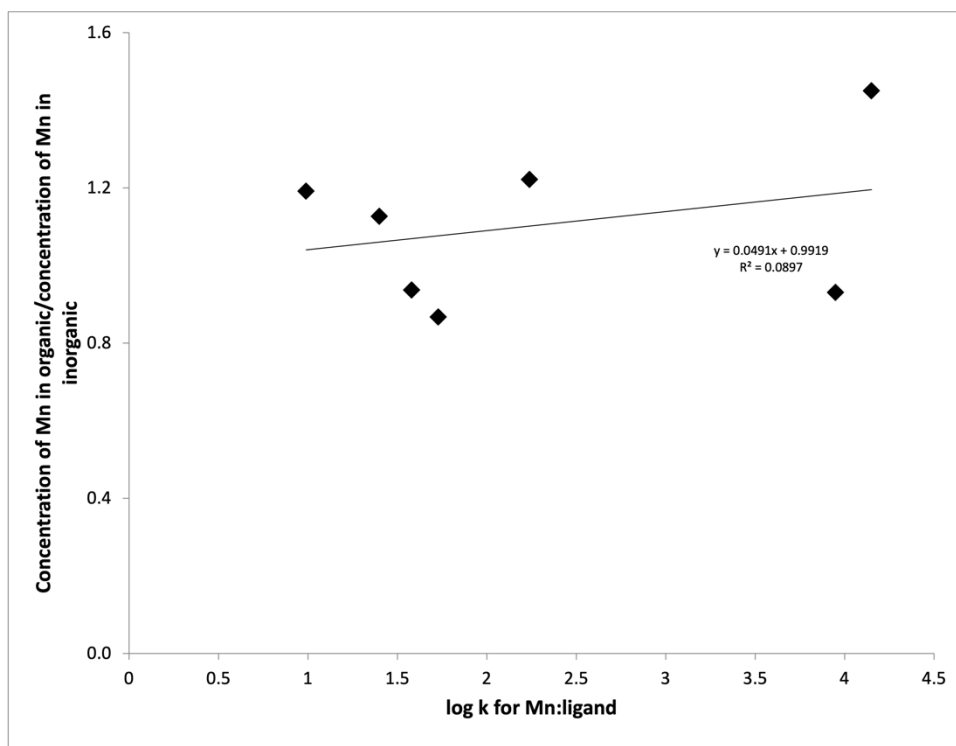

**Supplementary Figure S4.** Release ratios for Mn in organic solutions and nitric acid versus stability constant for the metal-ligand pair.

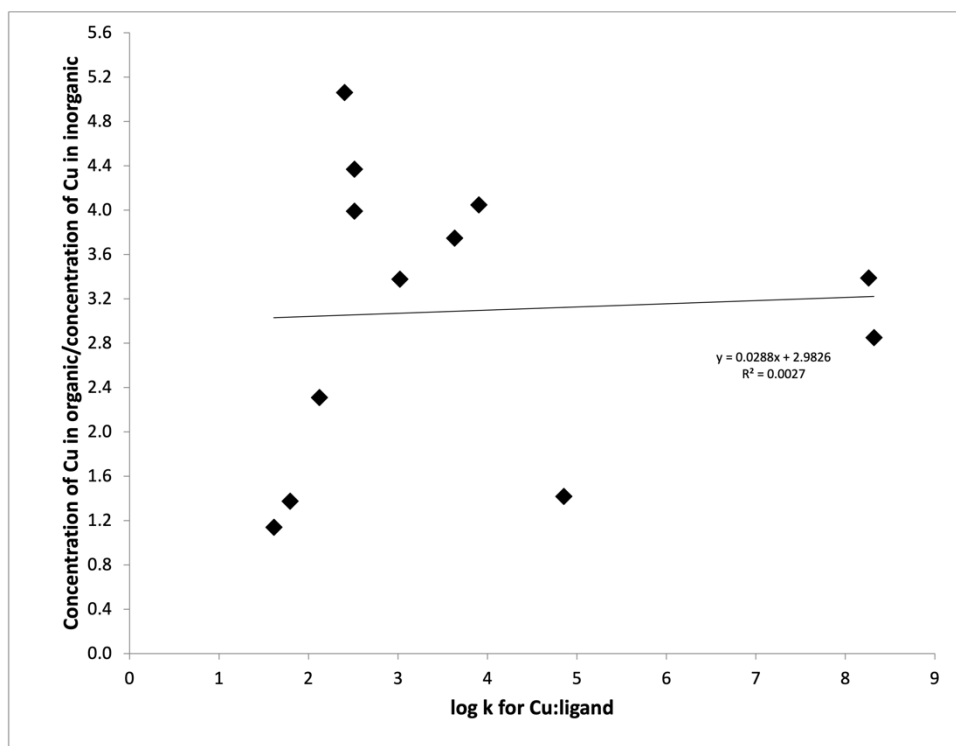

**Supplementary Figure S5.** Release ratios for Cu in organic solutions and nitric acid versus stability constant for the metal-ligand pair.

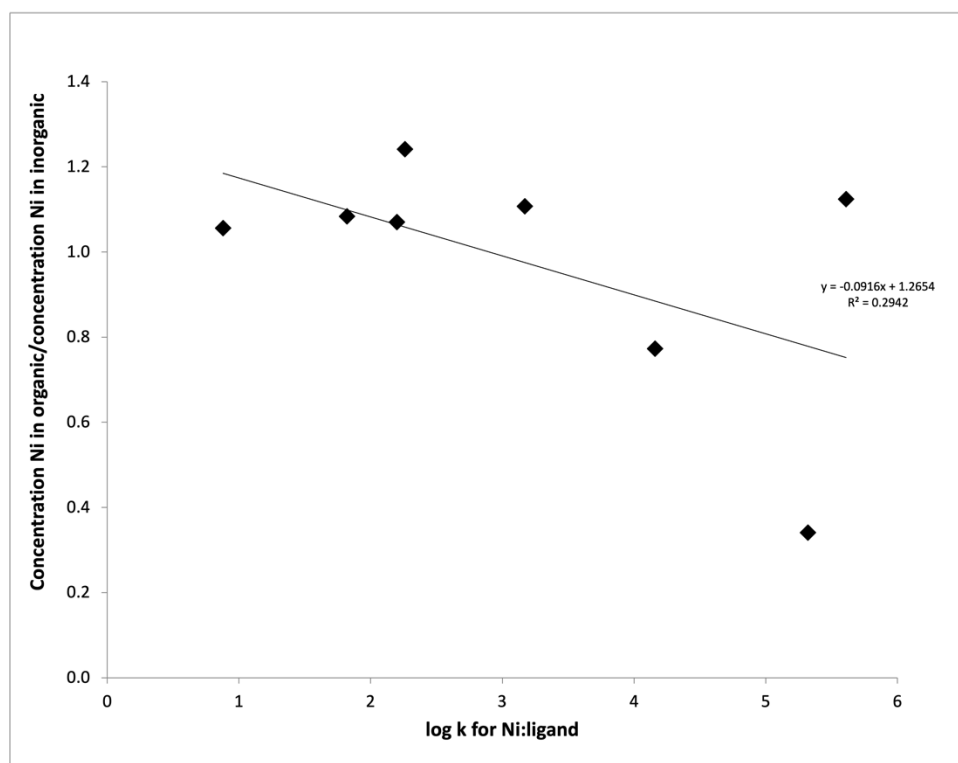

**Supplementary Figure S6.** Release ratios for Ni in organic solutions and nitric acid versus stability constant for the metal-ligand pair.

**Supplementary Table S1.** Sample conditions and pH.

| <b>Sample #</b> | <b>Acid</b> | <b>t (minutes)</b> | <b>T (°C)</b> | <b>pH</b> |
|-----------------|-------------|--------------------|---------------|-----------|
| <b>1</b>        | MSA         | 30                 | 0             | 2.82      |
| <b>2</b>        | MSA         | 180                | 0             | 3.02      |
| <b>3</b>        | MSA         | 480                | 0             | 3.28      |
| <b>4</b>        | MSA         | 1440               | 0             | 3.84      |
| <b>5</b>        | MSA         | 2880               | 0             | 4.39      |
| <b>6</b>        | MSA         | 4320               | 0             | 4.66      |
| <b>7</b>        | MSA         | 10080              | 0             | 4.43      |
| <b>8</b>        | MSA         | 20160              | 0             | 5.02      |
| <b>9</b>        | MSA         | 40320              | 0             | 4.76      |
| <b>10</b>       | Acetic      | 30                 | 0             | 2.84      |
| <b>11</b>       | Acetic      | 180                | 0             | 2.96      |
| <b>12</b>       | Acetic      | 480                | 0             | 3.27      |
| <b>13</b>       | Acetic      | 1440               | 0             | 3.87      |
| <b>14</b>       | Acetic      | 2880               | 0             | 4.14      |
| <b>15</b>       | Acetic      | 4320               | 0             | 4.42      |
| <b>16</b>       | Acetic      | 10080              | 0             | 4.49      |
| <b>17</b>       | Acetic      | 20160              | 0             | 4.65      |
| <b>18</b>       | Acetic      | 40320              | 0             | 4.52      |
| <b>19</b>       | Sulfuric    | 30                 | 0             | 2.91      |
| <b>20</b>       | Sulfuric    | 180                | 0             | 2.90      |
| <b>21</b>       | Sulfuric    | 480                | 0             | 3.08      |
| <b>22</b>       | Sulfuric    | 1440               | 0             | 3.50      |
| <b>23</b>       | Sulfuric    | 2880               | 0             | 4.08      |
| <b>24</b>       | Sulfuric    | 4320               | 0             | 4.45      |
| <b>25</b>       | Sulfuric    | 10080              | 0             | 5.18      |
| <b>26</b>       | Sulfuric    | 20160              | 0             | 5.14      |
| <b>27</b>       | Sulfuric    | 40320              | 0             | 4.94      |
| <b>28</b>       | Fumaric     | 30                 | 0             | 2.77      |
| <b>29</b>       | Fumaric     | 180                | 0             | 2.81      |
| <b>30</b>       | Fumaric     | 480                | 0             | 3         |
| <b>31</b>       | Fumaric     | 1440               | 0             | 3.11      |
| <b>32</b>       | Fumaric     | 2880               | 0             | 3.33      |
| <b>33</b>       | Fumaric     | 4320               | 0             | 3.46      |
| <b>34</b>       | Fumaric     | 10080              | 0             | 3.75      |
| <b>35</b>       | Fumaric     | 20160              | 0             | 3.66      |
| <b>36</b>       | Fumaric     | 40320              | 0             | 3.54      |
| <b>37</b>       | Glutamic    | 30                 | 0             | 2.77      |
| <b>38</b>       | Glutamic    | 180                | 0             | 2.84      |
| <b>39</b>       | Glutamic    | 480                | 0             | 2.93      |
| <b>40</b>       | Glutamic    | 1440               | 0             | 3.14      |



| <b>Sample #</b> | <b>Acid</b> | <b>t (minutes)</b> | <b>T (°C)</b> | <b>pH</b> |
|-----------------|-------------|--------------------|---------------|-----------|
| <b>41</b>       | Glutamic    | 2880               | 0             | 3.41      |
| <b>42</b>       | Glutamic    | 4320               | 0             | 3.63      |
| <b>43</b>       | Glutamic    | 10080              | 0             | 3.81      |
| <b>44</b>       | Glutamic    | 20160              | 0             | 3.89      |
| <b>45</b>       | Glutamic    | 40320              | 0             | 3.80      |
| <b>46</b>       | Formic      | 30                 | 0             | 2.85      |
| <b>47</b>       | Formic      | 180                | 0             | 2.86      |
| <b>48</b>       | Formic      | 480                | 0             | 3.03      |
| <b>49</b>       | Formic      | 1440               | 0             | 3.28      |
| <b>50</b>       | Formic      | 2880               | 0             | 3.45      |
| <b>51</b>       | Formic      | 4320               | 0             | 3.57      |
| <b>52</b>       | Formic      | 10080              | 0             | 3.59      |
| <b>53</b>       | Formic      | 20160              | 0             | 3.74      |
| <b>54</b>       | Formic      | 40320              | 0             | 3.64      |
| <b>55</b>       | Gluconic    | 30                 | 0             | 2.81      |
| <b>56</b>       | Gluconic    | 180                | 0             | 2.85      |
| <b>57</b>       | Gluconic    | 480                | 0             | 3.00      |
| <b>58</b>       | Gluconic    | 1440               | 0             | 3.30      |
| <b>59</b>       | Gluconic    | 2880               | 0             | 3.60      |
| <b>60</b>       | Gluconic    | 4320               | 0             | 3.85      |
| <b>61</b>       | Gluconic    | 10080              | 0             | 4.36      |
| <b>62</b>       | Gluconic    | 20160              | 0             | 4.48      |
| <b>63</b>       | Gluconic    | 40320              | 0             | 4.13      |
| <b>64</b>       | Citric      | 30                 | 0             | 2.75      |
| <b>65</b>       | Citric      | 180                | 0             | 2.94      |
| <b>66</b>       | Citric      | 480                | 0             | 2.98      |
| <b>67</b>       | Citric      | 1440               | 0             | 3.27      |
| <b>68</b>       | Citric      | 2880               | 0             | 3.42      |
| <b>69</b>       | Citric      | 4320               | 0             | 3.38      |
| <b>70</b>       | Citric      | 10080              | 0             | 3.25      |
| <b>71</b>       | Citric      | 20160              | 0             | 3.23      |
| <b>72</b>       | Citric      | 40320              | 0             | 3.13      |
| <b>73</b>       | Lactic      | 30                 | 0             | 2.90      |
| <b>74</b>       | Lactic      | 180                | 0             | 2.91      |
| <b>75</b>       | Lactic      | 480                | 0             | 3.06      |
| <b>76</b>       | Lactic      | 1440               | 0             | 3.25      |
| <b>77</b>       | Lactic      | 2880               | 0             | 3.49      |
| <b>78</b>       | Lactic      | 4320               | 0             | 3.63      |
| <b>79</b>       | Lactic      | 10080              | 0             | 3.80      |
| <b>80</b>       | Lactic      | 20160              | 0             | 3.99      |
| <b>81</b>       | Lactic      | 40320              | 0             | 3.83      |

| <b>Sample #</b> | <b>Acid</b> | <b>t (minutes)</b> | <b>T (°C)</b> | <b>pH</b> |
|-----------------|-------------|--------------------|---------------|-----------|
| <b>82</b>       | Malic       | 30                 | 0             | 2.82      |
| <b>83</b>       | Malic       | 180                | 0             | 2.79      |
| <b>84</b>       | Malic       | 480                | 0             | 2.94      |
| <b>85</b>       | Malic       | 1440               | 0             | 3.17      |
| <b>86</b>       | Malic       | 2880               | 0             | 3.38      |
| <b>87</b>       | Malic       | 4320               | 0             | 3.49      |
| <b>88</b>       | Malic       | 10080              | 0             | 3.46      |
| <b>89</b>       | Malic       | 20160              | 0             | 3.50      |
| <b>90</b>       | Malic       | 40320              | 0             | 3.30      |
| <b>91</b>       | Nonanoic    | 30                 | 0             | 2.75      |
| <b>92</b>       | Nonanoic    | 180                | 0             | 2.84      |
| <b>93</b>       | Nonanoic    | 480                | 0             | 3.00      |
| <b>94</b>       | Nonanoic    | 1440               | 0             | 3.63      |
| <b>95</b>       | Nonanoic    | 2880               | 0             | 4.12      |
| <b>96</b>       | Nonanoic    | 4320               | 0             | 4.47      |
| <b>97</b>       | Nonanoic    | 10080              | 0             | 4.55      |
| <b>98</b>       | Nonanoic    | 20160              | 0             | 5.11      |
| <b>99</b>       | Nonanoic    | 40320              | 0             | 4.81      |
| <b>100</b>      | Glycolic    | 30                 | 0             | 2.72      |
| <b>101</b>      | Glycolic    | 180                | 0             | 2.88      |
| <b>102</b>      | Glycolic    | 480                | 0             | 3.05      |
| <b>103</b>      | Glycolic    | 1440               | 0             | 3.28      |
| <b>104</b>      | Glycolic    | 2880               | 0             | 3.52      |
| <b>105</b>      | Glycolic    | 4320               | 0             | 3.66      |
| <b>106</b>      | Glycolic    | 10080              | 0             | 3.89      |
| <b>107</b>      | Glycolic    | 20160              | 0             | 4.07      |
| <b>108</b>      | Glycolic    | 40320              | 0             | 3.91      |
| <b>109</b>      | Oxalic      | 30                 | 0             | 2.69      |
| <b>110</b>      | Oxalic      | 180                | 0             | 2.81      |
| <b>111</b>      | Oxalic      | 480                | 0             | 2.92      |
| <b>112</b>      | Oxalic      | 1440               | 0             | 3.01      |
| <b>113</b>      | Oxalic      | 2880               | 0             | 3.15      |
| <b>114</b>      | Oxalic      | 4320               | 0             | 3.11      |
| <b>115</b>      | Oxalic      | 10080              | 0             | 3.25      |
| <b>116</b>      | Oxalic      | 20160              | 0             | 3.67      |
| <b>117</b>      | Oxalic      | 40320              | 0             | 3.79      |
| <b>118</b>      | AIB         | 30                 | 0             | 2.71      |
| <b>119</b>      | AIB         | 180                | 0             | 2.80      |
| <b>120</b>      | AIB         | 480                | 0             | 2.91      |
| <b>121</b>      | AIB         | 1440               | 0             | 3.10      |
| <b>122</b>      | AIB         | 2880               | 0             | 3.52      |

| <b>Sample #</b> | <b>Acid</b> | <b>t (minutes)</b> | <b>T (°C)</b> | <b>pH</b> |
|-----------------|-------------|--------------------|---------------|-----------|
| <b>123</b>      | AIB         | 4320               | 0             | 3.78      |
| <b>124</b>      | AIB         | 10080              | 0             | 3.96      |
| <b>125</b>      | AIB         | 20160              | 0             | 4.23      |
| <b>126</b>      | AIB         | 40320              | 0             | 4.10      |
| <b>127</b>      | Nitric      | 30                 | 0             | 2.81      |
| <b>128</b>      | Nitric      | 180                | 0             | 2.99      |
| <b>129</b>      | Nitric      | 480                | 0             | 3.31      |
| <b>130</b>      | Nitric      | 1440               | 0             | 3.78      |
| <b>131</b>      | Nitric      | 2880               | 0             | 4.13      |
| <b>132</b>      | Nitric      | 4320               | 0             | 4.42      |
| <b>133</b>      | Nitric      | 10080              | 0             | 4.62      |
| <b>134</b>      | Nitric      | 20160              | 0             | 4.80      |
| <b>135</b>      | Nitric      | 40320              | 0             | 4.65      |
| <b>136</b>      | Valeric     | 30                 | 0             | 2.82      |
| <b>137</b>      | Valeric     | 180                | 0             | 3.10      |
| <b>138</b>      | Valeric     | 480                | 0             | 3.37      |
| <b>139</b>      | Valeric     | 1440               | 0             | 3.88      |
| <b>140</b>      | Valeric     | 2880               | 0             | 4.04      |
| <b>141</b>      | Valeric     | 4320               | 0             | 4.26      |
| <b>142</b>      | Valeric     | 10080              | 0             | 4.28      |
| <b>143</b>      | Valeric     | 20160              | 0             | 4.45      |
| <b>144</b>      | Valeric     | 40320              | 0             | 4.33      |
| <b>145</b>      | MSA         | 30                 | 22            | 2.81      |
| <b>146</b>      | MSA         | 180                | 22            | 2.86      |
| <b>147</b>      | MSA         | 480                | 22            | 3.02      |
| <b>148</b>      | MSA         | 1440               | 22            | 3.77      |
| <b>149</b>      | MSA         | 2880               | 22            | 4.48      |
| <b>150</b>      | MSA         | 4320               | 22            | 4.91      |
| <b>151</b>      | MSA         | 10080              | 22            | 4.83      |
| <b>152</b>      | MSA         | 20160              | 22            | 4.65      |
| <b>153</b>      | MSA         | 40320              | 22            | 4.65      |
| <b>154</b>      | Acetic      | 30                 | 22            | 2.75      |
| <b>155</b>      | Acetic      | 180                | 22            | 3.01      |
| <b>156</b>      | Acetic      | 480                | 22            | 3.52      |
| <b>157</b>      | Acetic      | 1440               | 22            | 4.16      |
| <b>158</b>      | Acetic      | 2880               | 22            | 4.37      |
| <b>159</b>      | Acetic      | 4320               | 22            | 4.35      |
| <b>160</b>      | Acetic      | 10080              | 22            | 4.34      |
| <b>161</b>      | Acetic      | 20160              | 22            | 4.25      |
| <b>162</b>      | Acetic      | 40320              | 22            | 4.26      |

| <b>Sample #</b> | <b>Acid</b> | <b>t (minutes)</b> | <b>T (°C)</b> | <b>pH</b> |
|-----------------|-------------|--------------------|---------------|-----------|
| <b>163</b>      | Sulfuric    | 30                 | 22            | 2.76      |
| <b>164</b>      | Sulfuric    | 180                | 22            | 2.88      |
| <b>165</b>      | Sulfuric    | 480                | 22            | 3.02      |
| <b>166</b>      | Sulfuric    | 1440               | 22            | 3.58      |
| <b>167</b>      | Sulfuric    | 2880               | 22            | 4.25      |
| <b>168</b>      | Sulfuric    | 4320               | 22            | 4.62      |
| <b>169</b>      | Sulfuric    | 10080              | 22            | 4.88      |
| <b>170</b>      | Sulfuric    | 20160              | 22            | 4.62      |
| <b>171</b>      | Sulfuric    | 40320              | 22            | 4.69      |
| <b>172</b>      | Fumaric     | 30                 | 22            | 2.68      |
| <b>173</b>      | Fumaric     | 180                | 22            | 2.78      |
| <b>174</b>      | Fumaric     | 480                | 22            | 3.02      |
| <b>175</b>      | Fumaric     | 1440               | 22            | 3.22      |
| <b>176</b>      | Fumaric     | 2880               | 22            | 3.35      |
| <b>177</b>      | Fumaric     | 4320               | 22            | 3.41      |
| <b>178</b>      | Fumaric     | 10080              | 22            | 3.43      |
| <b>179</b>      | Fumaric     | 20160              | 22            | 3.5       |
| <b>180</b>      | Fumaric     | 40320              | 22            | 3.61      |
| <b>181</b>      | Glutamic    | 30                 | 22            | 2.68      |
| <b>182</b>      | Glutamic    | 180                | 22            | 2.73      |
| <b>183</b>      | Glutamic    | 480                | 22            | 2.88      |
| <b>184</b>      | Glutamic    | 1440               | 22            | 3.08      |
| <b>185</b>      | Glutamic    | 2880               | 22            | 3.55      |
| <b>186</b>      | Glutamic    | 4320               | 22            | 3.68      |
| <b>187</b>      | Glutamic    | 10080              | 22            | 3.67      |
| <b>188</b>      | Glutamic    | 20160              | 22            | 3.73      |
| <b>189</b>      | Glutamic    | 40320              | 22            | 3.74      |
| <b>190</b>      | Formic      | 30                 | 22            | 2.72      |
| <b>191</b>      | Formic      | 180                | 22            | 2.87      |
| <b>192</b>      | Formic      | 480                | 22            | 3.16      |
| <b>193</b>      | Formic      | 1440               | 22            | 3.75      |
| <b>194</b>      | Formic      | 2880               | 22            | 4.01      |
| <b>195</b>      | Formic      | 4320               | 22            | 4.16      |
| <b>196</b>      | Formic      | 10080              | 22            | 4.17      |
| <b>197</b>      | Formic      | 20160              | 22            | 4.15      |
| <b>198</b>      | Formic      | 40320              | 22            | 4.1       |
| <b>199</b>      | Gluconic    | 30                 | 22            | 2.82      |
| <b>200</b>      | Gluconic    | 180                | 22            | 3.11      |
| <b>201</b>      | Gluconic    | 480                | 22            | 3.44      |
| <b>202</b>      | Gluconic    | 1440               | 22            | 3.69      |
| <b>203</b>      | Gluconic    | 2880               | 22            | 3.73      |

| <b>Sample #</b> | <b>Acid</b> | <b>t (minutes)</b> | <b>T (°C)</b> | <b>pH</b> |
|-----------------|-------------|--------------------|---------------|-----------|
| <b>204</b>      | Gluconic    | 4320               | 22            | 3.72      |
| <b>205</b>      | Gluconic    | 10080              | 22            | 3.73      |
| <b>206</b>      | Gluconic    | 20160              | 22            | 3.68      |
| <b>207</b>      | Gluconic    | 40320              | 22            | 3.85      |
| <b>208</b>      | Citric      | 30                 | 22            | 2.87      |
| <b>209</b>      | Citric      | 180                | 22            | 3.09      |
| <b>210</b>      | Citric      | 480                | 22            | 3.23      |
| <b>211</b>      | Citric      | 1440               | 22            | 3.21      |
| <b>212</b>      | Citric      | 2880               | 22            | 3.11      |
| <b>213</b>      | Citric      | 4320               | 22            | 3.08      |
| <b>214</b>      | Citric      | 10080              | 22            | 3.13      |
| <b>215</b>      | Citric      | 20160              | 22            | 3.45      |
| <b>216</b>      | Citric      | 40320              | 22            | 4.40      |
| <b>217</b>      | Lactic      | 30                 | 22            | 2.94      |
| <b>218</b>      | Lactic      | 180                | 22            | 3.10      |
| <b>219</b>      | Lactic      | 480                | 22            | 3.37      |
| <b>220</b>      | Lactic      | 1440               | 22            | 3.75      |
| <b>221</b>      | Lactic      | 2880               | 22            | 3.80      |
| <b>222</b>      | Lactic      | 4320               | 22            | 3.80      |
| <b>223</b>      | Lactic      | 10080              | 22            | 3.87      |
| <b>224</b>      | Lactic      | 20160              | 22            | 3.88      |
| <b>225</b>      | Lactic      | 40320              | 22            | 4.00      |
| <b>226</b>      | Malic       | 30                 | 22            | 2.85      |
| <b>227</b>      | Malic       | 180                | 22            | 2.95      |
| <b>228</b>      | Malic       | 480                | 22            | 3.14      |
| <b>229</b>      | Malic       | 1440               | 22            | 3.36      |
| <b>230</b>      | Malic       | 2880               | 22            | 3.40      |
| <b>231</b>      | Malic       | 4320               | 22            | 3.46      |
| <b>232</b>      | Malic       | 10080              | 22            | 3.39      |
| <b>233</b>      | Malic       | 20160              | 22            | 3.44      |
| <b>234</b>      | Malic       | 40320              | 22            | 3.83      |
| <b>235</b>      | Nonanoic    | 30                 | 22            | 2.85      |
| <b>236</b>      | Nonanoic    | 180                | 22            | 3.00      |
| <b>237</b>      | Nonanoic    | 480                | 22            | 3.38      |
| <b>238</b>      | Nonanoic    | 1440               | 22            | 4.10      |
| <b>239</b>      | Nonanoic    | 2880               | 22            | 4.21      |
| <b>240</b>      | Nonanoic    | 4320               | 22            | 4.24      |
| <b>241</b>      | Nonanoic    | 10080              | 22            | 4.18      |
| <b>242</b>      | Nonanoic    | 20160              | 22            | 4.27      |
| <b>243</b>      | Nonanoic    | 40320              | 22            | 4.45      |

| <b>Sample #</b> | <b>Acid</b> | <b>t (minutes)</b> | <b>T (°C)</b> | <b>pH</b> |
|-----------------|-------------|--------------------|---------------|-----------|
| <b>244</b>      | Glycolic    | 30                 | 22            | 2.92      |
| <b>245</b>      | Glycolic    | 180                | 22            | 3.16      |
| <b>246</b>      | Glycolic    | 480                | 22            | 3.51      |
| <b>247</b>      | Glycolic    | 1440               | 22            | 3.71      |
| <b>248</b>      | Glycolic    | 2880               | 22            | 3.71      |
| <b>249</b>      | Glycolic    | 4320               | 22            | 3.75      |
| <b>250</b>      | Glycolic    | 10080              | 22            | 3.76      |
| <b>251</b>      | Glycolic    | 20160              | 22            | 3.78      |
| <b>252</b>      | Glycolic    | 40320              | 22            | 3.89      |
| <b>253</b>      | Oxalic      | 30                 | 22            | 2.87      |
| <b>254</b>      | Oxalic      | 180                | 22            | 2.98      |
| <b>255</b>      | Oxalic      | 480                | 22            | 2.98      |
| <b>256</b>      | Oxalic      | 1440               | 22            | 3.11      |
| <b>257</b>      | Oxalic      | 2880               | 22            | 3.19      |
| <b>258</b>      | Oxalic      | 4320               | 22            | 3.37      |
| <b>259</b>      | Oxalic      | 10080              | 22            | 4.08      |
| <b>260</b>      | Oxalic      | 20160              | 22            | 4.92      |
| <b>261</b>      | Oxalic      | 40320              | 22            | 5.38      |
| <b>262</b>      | AIB         | 30                 | 22            | 2.81      |
| <b>263</b>      | AIB         | 180                | 22            | 2.88      |
| <b>264</b>      | AIB         | 480                | 22            | 3.16      |
| <b>265</b>      | AIB         | 1440               | 22            | 3.57      |
| <b>266</b>      | AIB         | 2880               | 22            | 3.71      |
| <b>267</b>      | AIB         | 4320               | 22            | 3.79      |
| <b>268</b>      | AIB         | 10080              | 22            | 3.89      |
| <b>269</b>      | AIB         | 20160              | 22            | 4.00      |
| <b>270</b>      | AIB         | 40320              | 22            | 4.14      |
| <b>271</b>      | Nitric      | 30                 | 22            | 2.80      |
| <b>272</b>      | Nitric      | 180                | 22            | 2.96      |
| <b>273</b>      | Nitric      | 480                | 22            | 3.09      |
| <b>274</b>      | Nitric      | 1440               | 22            | 3.97      |
| <b>275</b>      | Nitric      | 2880               | 22            | 4.68      |
| <b>276</b>      | Nitric      | 4320               | 22            | 4.84      |
| <b>277</b>      | Nitric      | 10080              | 22            | 4.65      |
| <b>278</b>      | Nitric      | 20160              | 22            | 4.37      |
| <b>279</b>      | Nitric      | 40320              | 22            | 4.46      |
| <b>280</b>      | Valeric     | 30                 | 22            | 2.71      |
| <b>281</b>      | Valeric     | 180                | 22            | 3.02      |
| <b>282</b>      | Valeric     | 480                | 22            | 3.65      |
| <b>283</b>      | Valeric     | 1440               | 22            | 4.34      |
| <b>284</b>      | Valeric     | 2880               | 22            | 4.48      |

| <b>Sample #</b> | <b>Acid</b> | <b>t (minutes)</b> | <b>T (°C)</b> | <b>pH</b> |
|-----------------|-------------|--------------------|---------------|-----------|
| <b>285</b>      | Valeric     | 4320               | 22            | 4.49      |
| <b>286</b>      | Valeric     | 10080              | 22            | 4.43      |
| <b>287</b>      | Valeric     | 20160              | 22            | 4.24      |
| <b>288</b>      | Valeric     | 40320              | 22            | 4.12      |
| <b>289</b>      | MSA         | 30                 | 62            | 2.66      |
| <b>290</b>      | MSA         | 180                | 62            | 2.92      |
| <b>291</b>      | MSA         | 480                | 62            | 3.63      |
| <b>292</b>      | MSA         | 1440               | 62            | 4.18      |
| <b>293</b>      | MSA         | 2880               | 62            | 4.23      |
| <b>294</b>      | MSA         | 4320               | 62            | 4.36      |
| <b>295</b>      | MSA         | 10080              | 62            | 5.62      |
| <b>296</b>      | MSA         | 20160              | 62            | 6.47      |
| <b>297</b>      | MSA         | 40320              | 62            | 6.75      |
| <b>298</b>      | Acetic      | 30                 | 62            | 2.89      |
| <b>299</b>      | Acetic      | 180                | 62            | 3.77      |
| <b>300</b>      | Acetic      | 480                | 62            | 4.23      |
| <b>301</b>      | Acetic      | 1440               | 62            | 3.98      |
| <b>302</b>      | Acetic      | 2880               | 62            | 4.04      |
| <b>303</b>      | Acetic      | 4320               | 62            | 4.32      |
| <b>304</b>      | Acetic      | 10080              | 62            | 5.05      |
| <b>305</b>      | Acetic      | 20160              | 62            | 5.47      |
| <b>306</b>      | Acetic      | 40320              | 62            | 5.66      |
| <b>307</b>      | Sulfuric    | 30                 | 62            | 2.72      |
| <b>308</b>      | Sulfuric    | 180                | 62            | 2.95      |
| <b>309</b>      | Sulfuric    | 480                | 62            | 3.28      |
| <b>310</b>      | Sulfuric    | 1440               | 62            | 4.34      |
| <b>311</b>      | Sulfuric    | 2880               | 62            | 4.28      |
| <b>312</b>      | Sulfuric    | 4320               | 62            | 4.49      |
| <b>313</b>      | Sulfuric    | 10080              | 62            | 5.72      |
| <b>314</b>      | Sulfuric    | 20160              | 62            | 6.63      |
| <b>315</b>      | Sulfuric    | 40320              | 62            | 7.02      |
| <b>316</b>      | Fumaric     | 30                 | 62            | 2.61      |
| <b>317</b>      | Fumaric     | 180                | 62            | 2.82      |
| <b>318</b>      | Fumaric     | 480                | 62            | 3.01      |
| <b>319</b>      | Fumaric     | 1440               | 62            | 3.25      |
| <b>320</b>      | Fumaric     | 2880               | 62            | 3.44      |
| <b>321</b>      | Fumaric     | 4320               | 62            | 3.53      |
| <b>322</b>      | Fumaric     | 10080              | 62            | 3.87      |
| <b>323</b>      | Fumaric     | 20160              | 62            | 4.17      |
| <b>324</b>      | Fumaric     | 40320              | 62            | 4.51      |
| <b>325</b>      | Glutamic    | 30                 | 62            | 2.68      |

| <b>Sample #</b> | <b>Acid</b> | <b>t (minutes)</b> | <b>T (°C)</b> | <b>pH</b> |
|-----------------|-------------|--------------------|---------------|-----------|
| <b>326</b>      | Glutamic    | 180                | 62            | 2.92      |
| <b>327</b>      | Glutamic    | 480                | 62            | 3.18      |
| <b>328</b>      | Glutamic    | 1440               | 62            | 3.59      |
| <b>329</b>      | Glutamic    | 2880               | 62            | 3.70      |
| <b>330</b>      | Glutamic    | 4320               | 62            | 3.67      |
| <b>331</b>      | Glutamic    | 10080              | 62            | 3.79      |
| <b>332</b>      | Glutamic    | 20160              | 62            | 4.45      |
| <b>333</b>      | Glutamic    | 40320              | 62            | 5.31      |
| <b>334</b>      | Formic      | 30                 | 62            | 2.72      |
| <b>335</b>      | Formic      | 180                | 62            | 3.16      |
| <b>336</b>      | Formic      | 480                | 62            | 3.37      |
| <b>337</b>      | Formic      | 1440               | 62            | 3.52      |
| <b>338</b>      | Formic      | 2880               | 62            | 3.69      |
| <b>339</b>      | Formic      | 4320               | 62            | 3.73      |
| <b>340</b>      | Formic      | 10080              | 62            | 4.01      |
| <b>341</b>      | Formic      | 20160              | 62            | 4.61      |
| <b>342</b>      | Formic      | 40320              | 62            | 5.32      |
| <b>343</b>      | Gluconic    | 30                 | 62            | 2.86      |
| <b>344</b>      | Gluconic    | 180                | 62            | 3.38      |
| <b>345</b>      | Gluconic    | 480                | 62            | 3.70      |
| <b>346</b>      | Gluconic    | 1440               | 62            | 4.07      |
| <b>347</b>      | Gluconic    | 2880               | 62            | 4.12      |
| <b>348</b>      | Gluconic    | 4320               | 62            | 4.05      |
| <b>349</b>      | Gluconic    | 10080              | 62            | 4.56      |
| <b>350</b>      | Gluconic    | 20160              | 62            | 5.80      |
| <b>351</b>      | Gluconic    | 40320              | 62            | 6.02      |
| <b>352</b>      | Citric      | 30                 | 62            | 2.91      |
| <b>353</b>      | Citric      | 180                | 62            | 3.21      |
| <b>354</b>      | Citric      | 480                | 62            | 3.25      |
| <b>355</b>      | Citric      | 1440               | 62            | 3.37      |
| <b>356</b>      | Citric      | 2880               | 62            | 4.38      |
| <b>357</b>      | Citric      | 4320               | 62            | 5.00      |
| <b>358</b>      | Citric      | 10080              | 62            | 6.15      |
| <b>359</b>      | Citric      | 20160              | 62            | 6.63      |
| <b>360</b>      | Citric      | 40320              | 62            | 7.00      |
| <b>361</b>      | Lactic      | 30                 | 62            | 2.92      |
| <b>362</b>      | Lactic      | 180                | 62            | 3.43      |
| <b>363</b>      | Lactic      | 480                | 62            | 3.60      |
| <b>364</b>      | Lactic      | 1440               | 62            | 3.87      |
| <b>365</b>      | Lactic      | 2880               | 62            | 3.82      |
| <b>366</b>      | Lactic      | 4320               | 62            | 3.81      |
| <b>367</b>      | Lactic      | 10080              | 62            | 4.28      |



| <b>Sample #</b> | <b>Acid</b> | <b>t (minutes)</b> | <b>T (°C)</b> | <b>pH</b> |
|-----------------|-------------|--------------------|---------------|-----------|
| <b>368</b>      | Lactic      | 20160              | 62            | 5.34      |
| <b>369</b>      | Lactic      | 40320              | 62            | 5.99      |
| <b>370</b>      | Malic       | 30                 | 62            | 2.75      |
| <b>371</b>      | Malic       | 180                | 62            | 3.10      |
| <b>372</b>      | Malic       | 480                | 62            | 3.29      |
| <b>373</b>      | Malic       | 1440               | 62            | 3.35      |
| <b>374</b>      | Malic       | 2880               | 62            | 3.73      |
| <b>375</b>      | Malic       | 4320               | 62            | 4.21      |
| <b>376</b>      | Malic       | 10080              | 62            | 5.12      |
| <b>377</b>      | Malic       | 20160              | 62            | 5.76      |
| <b>378</b>      | Malic       | 40320              | 62            | 6.40      |
| <b>379</b>      | Nonanoic    | 30                 | 62            | 2.84      |
| <b>380</b>      | Nonanoic    | 180                | 62            | 4.05      |
| <b>381</b>      | Nonanoic    | 480                | 62            | 4.37      |
| <b>382</b>      | Nonanoic    | 1440               | 62            | 4.62      |
| <b>383</b>      | Nonanoic    | 2880               | 62            | 4.48      |
| <b>384</b>      | Nonanoic    | 4320               | 62            | 4.67      |
| <b>385</b>      | Nonanoic    | 10080              | 62            | 5.74      |
| <b>386</b>      | Nonanoic    | 20160              | 62            | 6.05      |
| <b>387</b>      | Nonanoic    | 40320              | 62            | 6.54      |
| <b>388</b>      | Glycolic    | 30                 | 62            | 2.93      |
| <b>389</b>      | Glycolic    | 180                | 62            | 3.36      |
| <b>390</b>      | Glycolic    | 480                | 62            | 3.54      |
| <b>391</b>      | Glycolic    | 1440               | 62            | 3.89      |
| <b>392</b>      | Glycolic    | 2880               | 62            | 3.81      |
| <b>393</b>      | Glycolic    | 4320               | 62            | 3.80      |
| <b>394</b>      | Glycolic    | 10080              | 62            | 4.39      |
| <b>395</b>      | Glycolic    | 20160              | 62            | 5.46      |
| <b>396</b>      | Glycolic    | 40320              | 62            | 6.04      |
| <b>397</b>      | Oxalic      | 30                 | 62            | 2.88      |
| <b>398</b>      | Oxalic      | 180                | 62            | 3.09      |
| <b>399</b>      | Oxalic      | 480                | 62            | 3.67      |
| <b>400</b>      | Oxalic      | 1440               | 62            | 4.65      |
| <b>401</b>      | Oxalic      | 2880               | 62            | 5.22      |
| <b>402</b>      | Oxalic      | 4320               | 62            | 5.34      |
| <b>403</b>      | Oxalic      | 10080              | 62            | 5.76      |
| <b>404</b>      | Oxalic      | 20160              | 62            | 5.92      |
| <b>405</b>      | Oxalic      | 40320              | 62            | 6.14      |
| <b>406</b>      | AIB         | 30                 | 62            | 2.78      |
| <b>407</b>      | AIB         | 180                | 62            | 3.11      |
| <b>408</b>      | AIB         | 480                | 62            | 3.81      |

| <b>Sample #</b> | <b>Acid</b> | <b>t (minutes)</b> | <b>T (°C)</b> | <b>pH</b> |
|-----------------|-------------|--------------------|---------------|-----------|
| <b>409</b>      | AIB         | 1440               | 62            | 4.03      |
| <b>410</b>      | AIB         | 2880               | 62            | 3.97      |
| <b>411</b>      | AIB         | 4320               | 62            | 4.02      |
| <b>412</b>      | AIB         | 10080              | 62            | 4.62      |
| <b>413</b>      | AIB         | 20160              | 62            | 5.74      |
| <b>414</b>      | AIB         | 40320              | 62            | 6.38      |
| <b>415</b>      | Nitric      | 30                 | 62            | 2.83      |
| <b>416</b>      | Nitric      | 180                | 62            | 3.86      |
| <b>417</b>      | Nitric      | 480                | 62            | 4.26      |
| <b>418</b>      | Nitric      | 1440               | 62            | 4.46      |
| <b>419</b>      | Nitric      | 2880               | 62            | 4.34      |
| <b>420</b>      | Nitric      | 4320               | 62            | 4.53      |
| <b>421</b>      | Nitric      | 10080              | 62            | 5.64      |
| <b>422</b>      | Nitric      | 20160              | 62            | 6.29      |
| <b>423</b>      | Nitric      | 40320              | 62            | 6.66      |
| <b>424</b>      | Valeric     | 30                 | 62            | 3.19      |
| <b>425</b>      | Valeric     | 180                | 62            | 3.98      |
| <b>426</b>      | Valeric     | 480                | 62            | 4.13      |
| <b>427</b>      | Valeric     | 1440               | 62            | 4.06      |
| <b>428</b>      | Valeric     | 2880               | 62            | 4.04      |
| <b>429</b>      | Valeric     | 4320               | 62            | 4.07      |
| <b>430</b>      | Valeric     | 10080              | 62            | 4.56      |
| <b>431</b>      | Valeric     | 20160              | 62            | 5.04      |
| <b>432</b>      | Valeric     | 40320              | 62            | 5.41      |

**Supplementary Table S2.** p-values which describe the y-intercepts of each acid compared to nitric acid for each acid-cation pair for Model 2 for Research Question 2.

| Element     | AIB     | Acetic  | Citric  | Formic  | Fumaric | Gluconic | Glutamic | Glycolic | Lactic  |
|-------------|---------|---------|---------|---------|---------|----------|----------|----------|---------|
| <b>Al</b>   | 0.04210 | 0.18300 | < 2e-16 | 0.00000 | 0.00000 | 0.00000  | 0.00000  | 0.00000  | 0.00000 |
| <b>Ba</b>   | 0.21100 | < 2e-16 | 0.19300 | 0.00000 | 0.00000 | 0.14900  | 0.00000  | 0.22800  | 0.21600 |
| <b>Ca</b>   | 0.28800 | 0.66200 | 0.00000 | 0.45900 | 0.44000 | 0.19500  | 0.61800  | 0.25500  | 0.46500 |
| <b>Cd</b>   | 0.67000 | 0.01270 | 0.00128 | 0.03150 | 0.02360 | 0.43000  | 0.89700  | 0.00741  | 0.06190 |
| <b>Ce</b>   | 0.03980 | 0.00335 | < 2e-16 | 0.00030 | 0.00487 | 0.01410  | 0.00000  | 0.00537  | 0.00037 |
| <b>Co</b>   | 0.00668 | 0.00425 | 0.00000 | 0.00000 | 0.00000 | 0.20400  | 0.01400  | 0.00176  | 0.00048 |
| <b>Cr</b>   | 0.00000 | 0.00007 | < 2e-16 | 0.00000 | < 2e-16 | < 2e-16  | < 2e-16  | < 2e-16  | < 2e-16 |
| <b>Cs</b>   | 0.09690 | 0.46700 | 0.25600 | 0.00199 | 0.00029 | 0.45000  | 0.00002  | 0.34400  | 0.37500 |
| <b>Cu</b>   | 0.00000 | 0.04280 | 0.00011 | 0.00350 | 0.00000 | 0.00178  | 0.00001  | 0.00002  | 0.00032 |
| <b>Fe57</b> | 0.00063 | 0.00715 | 0.00000 | 0.00197 | 0.00001 | 0.00002  | 0.00106  | 0.00179  | 0.00045 |
| <b>Fe58</b> | 0.00360 | 0.00427 | 0.00000 | 0.00377 | 0.00010 | 0.25000  | 0.39000  | 0.00340  | 0.01110 |
| <b>K</b>    | 0.31100 | 0.71600 | 0.00299 | 0.00332 | 0.02390 | 0.14500  | 0.07660  | 0.00273  | 0.00647 |
| <b>La</b>   | 0.07430 | 0.25100 | < 2e-16 | 0.00040 | 0.00759 | 0.12300  | 0.00000  | 0.01560  | 0.00698 |
| <b>Mg</b>   | 0.08770 | 0.00394 | < 2e-16 | 0.00012 | 0.00000 | 0.36400  | 0.05510  | 0.00027  | 0.00001 |
| <b>Mn</b>   | 0.00610 | 0.00001 | 0.00000 | 0.00468 | 0.00001 | 0.71300  | 0.21100  | 0.00625  | 0.03320 |
| <b>Mo</b>   | 0.00084 | 0.00324 | < 2e-16 | 0.00355 | 0.00000 | < 2e-16  | 0.00078  | < 2e-16  | < 2e-16 |
| <b>Na</b>   | 0.39000 | 0.00963 | 0.05930 | 0.65300 | 0.57200 | 0.13300  | 0.15000  | 0.18600  | 0.00491 |
| <b>Ni</b>   | 0.04920 | 0.09520 | 0.00002 | 0.03730 | 0.00199 | 0.54500  | 0.66300  | 0.03460  | 0.16100 |
| <b>Pb</b>   | 0.00099 | 0.00105 | 0.00000 | 0.00000 | 0.00000 | 0.00000  | 0.00000  | < 2e-16  | 0.00000 |
| <b>P</b>    | 0.86495 | 0.25509 | 0.00000 | 0.22123 | 0.66051 | 0.03715  | 0.47500  | 0.18000  | 0.84800 |
| <b>Pr</b>   | 0.03848 | 0.28858 | < 2e-16 | 0.00229 | 0.00825 | 0.00615  | 0.00045  | 0.00367  | 0.00015 |
| <b>Rb</b>   | 0.12975 | 0.19866 | 0.01150 | 0.15626 | 0.02336 | 0.00669  | 0.05950  | 0.00579  | 0.00387 |
| <b>Sc</b>   | 0.00000 | 0.00000 | < 2e-16 | < 2e-16 | < 2e-16 | < 2e-16  | < 2e-16  | < 2e-16  | < 2e-16 |
| <b>S</b>    | 0.30500 | 0.11500 | 0.04120 | 0.13487 | 0.01193 | 0.08670  | 0.01270  | 0.02870  | 0.23300 |
| <b>Si</b>   | 0.15900 | 0.00000 | 0.00000 | 0.01960 | 0.00000 | 0.07840  | 0.00002  | 0.00329  | 0.00161 |
| <b>Sr</b>   | 0.18100 | 0.01830 | 0.80700 | 0.55462 | 0.25494 | 0.01185  | 0.00460  | 0.28800  | 0.19900 |
| <b>Th</b>   | 0.79600 | 0.01430 | < 2e-16 | 0.00370 | 0.00000 | 0.00000  | 0.00007  | 0.00000  | 0.00000 |
| <b>Ti</b>   | 0.00927 | 0.20400 | < 2e-16 | 0.00000 | < 2e-16 | < 2e-16  | 0.00000  | < 2e-16  | < 2e-16 |
| <b>U</b>    | < 2e-16 | 0.00000  | < 2e-16  | 0.00000  | 0.00000 |
| <b>V</b>    | 0.00049 | 0.00813 | < 2e-16 | < 2e-16 | < 2e-16 | < 2e-16  | < 2e-16  | < 2e-16  | < 2e-16 |
| <b>W182</b> | 0.45300 | 0.90400 | < 2e-16 | 0.06590 | 0.00000 | < 2e-16  | 0.71700  | < 2e-16  | < 2e-16 |
| <b>W184</b> | 0.40200 | 0.69800 | < 2e-16 | 0.14500 | 0.00000 | < 2e-16  | 0.43600  | < 2e-16  | < 2e-16 |
| <b>Y</b>    | 0.03610 | 0.27000 | < 2e-16 | 0.00175 | 0.00034 | 0.01200  | 0.32100  | 0.00073  | 0.00001 |
| <b>Zn</b>   | 0.91800 | 0.15000 | 0.30200 | 0.00165 | 0.06810 | 0.74600  | 0.11600  | 0.48400  | 0.95700 |
| <b>Zr90</b> | 0.49300 | 0.41200 | < 2e-16 | 0.11900 | 0.00000 | < 2e-16  | 0.01140  | 0.00000  | 0.00000 |
| <b>Zr91</b> | 0.05120 | 0.32200 | < 2e-16 | 0.00831 | 0.00000 | < 2e-16  | 0.00042  | 0.00000  | 0.00000 |

Supplementary Table S3. p-values which describe the y-intercepts of each acid compared to sulfuric acid for each acid-cation pair for Model 2 for Research Question 3.

| Element     | Malic   | MSA     | Nonanoic | Oxalic  | Sulfuric | Valeric |
|-------------|---------|---------|----------|---------|----------|---------|
| <b>Al</b>   | < 2e-16 | 0.00000 | 0.29700  | < 2e-16 | 0.00543  | 0.15800 |
| <b>Ba</b>   | 0.00011 | 0.00000 | 0.07190  | 0.31800 | < 2e-16  | 0.03190 |
| <b>Ca</b>   | 0.04080 | 0.01710 | 0.03950  | 0.01970 | 0.01960  | 0.12100 |
| <b>Cd</b>   | 0.00045 | 0.76800 | 0.00123  | 0.51800 | 0.03840  | 0.00985 |
| <b>Ce</b>   | 0.00000 | 0.56800 | 0.02500  | 0.00000 | 0.19300  | 0.53000 |
| <b>Co</b>   | 0.00000 | 0.58100 | 0.48600  | 0.00000 | 0.00717  | 0.00462 |
| <b>Cr</b>   | < 2e-16 | 0.11600 | 0.00011  | < 2e-16 | 0.00000  | 0.00048 |
| <b>Cs</b>   | 0.00057 | 0.00008 | 0.82200  | 0.04610 | 0.67300  | 0.00199 |
| <b>Cu</b>   | 0.00012 | 0.04240 | 0.52300  | 0.08600 | 0.62100  | 0.01140 |
| <b>Fe57</b> | 0.00000 | 0.62500 | 0.40500  | 0.10100 | 0.21100  | 0.01670 |
| <b>Fe58</b> | 0.00007 | 0.00184 | 0.17200  | 0.00274 | 0.10600  | 0.01400 |
| <b>K</b>    | 0.07580 | 0.53100 | 0.01330  | 0.03290 | 0.00013  | 0.03040 |
| <b>La</b>   | 0.00000 | 0.05980 | 0.05490  | 0.00000 | 0.22900  | 0.60300 |
| <b>Mg</b>   | < 2e-16 | 0.09790 | 0.13900  | < 2e-16 | 0.00000  | 0.09650 |
| <b>Mn</b>   | 0.00046 | 0.01130 | 0.16200  | 0.30300 | 0.05680  | 0.00691 |
| <b>Mo</b>   | < 2e-16 | 0.23200 | 0.00057  | < 2e-16 | 0.00000  | 0.05650 |
| <b>Na</b>   | 0.67000 | 0.16900 | 0.01500  | 0.19800 | 0.07230  | 0.01010 |
| <b>Ni</b>   | 0.00194 | 0.04950 | 0.41700  | 0.00021 | 0.05900  | 0.18300 |
| <b>Pb</b>   | 0.00000 | 0.00066 | 0.00004  | 0.00000 | 0.00362  | 0.00163 |
| <b>P</b>    | 0.00027 | 0.61000 | 0.02330  | 0.00002 | 0.04370  | 0.49257 |
| <b>Pr</b>   | 0.00000 | 0.81700 | 0.02069  | 0.00000 | 0.19500  | 0.52894 |
| <b>Rb</b>   | 0.00085 | 0.77500 | 0.11952  | 0.27200 | 0.00005  | 0.11955 |
| <b>Sc</b>   | < 2e-16 | 0.19300 | 0.33300  | < 2e-16 | < 2e-16  | 0.00000 |
| <b>S</b>    | 0.16300 | < 2e-16 | 0.03161  | 0.00000 | < 2e-16  | 0.32700 |
| <b>Si</b>   | 0.00000 | 0.02370 | 0.19500  | 0.00000 | 0.00000  | 0.51300 |
| <b>Sr</b>   | 0.37000 | 0.00191 | 0.18280  | 0.11400 | 0.03800  | 0.45800 |
| <b>Th</b>   | < 2e-16 | 0.00727 | 0.04887  | < 2e-16 | 0.00013  | 0.82800 |
| <b>Ti</b>   | < 2e-16 | 0.00000 | 0.14947  | < 2e-16 | 0.00000  | 0.67200 |
| <b>U</b>    | < 2e-16 | < 2e-16 | 0.00716  | < 2e-16 | < 2e-16  | 0.00009 |
| <b>V</b>    | < 2e-16 | < 2e-16 | 0.07980  | < 2e-16 | 0.00000  | 0.89200 |
| <b>W182</b> | < 2e-16 | 0.49900 | 0.00000  | < 2e-16 | 0.00478  | 0.35200 |
| <b>W184</b> | < 2e-16 | 0.29400 | 0.00000  | < 2e-16 | 0.00109  | 0.55700 |
| <b>Y</b>    | < 2e-16 | 0.83000 | 0.01740  | < 2e-16 | 0.01110  | 0.56800 |
| <b>Zn</b>   | 0.12700 | 0.72300 | 0.00112  | 0.26200 | 0.48800  | 0.02840 |
| <b>Zr90</b> | < 2e-16 | 0.03630 | 0.01310  | < 2e-16 | 0.00000  | 0.01520 |
| <b>Zr91</b> | < 2e-16 | 0.16600 | 0.01830  | < 2e-16 | 0.00003  | 0.00082 |

| Element     | AIB     | Acetic  | Citric  | Formic  | Fumaric | Gluconic | Glutamic | Glycolic | Lactic  |
|-------------|---------|---------|---------|---------|---------|----------|----------|----------|---------|
| <b>Al</b>   | 0.44983 | 0.14468 | 0.00000 | 0.00506 | 0.00000 | 0.03750  | 0.00130  | 0.05816  | 0.00370 |
| <b>Ba</b>   | < 2e-16 | 0.00808 | 0.00000 | 0.00004 | 0.00010 | 0.00000  | 0.00016  | 0.00000  | 0.00000 |
| <b>Ca</b>   | 0.20161 | 0.05738 | 0.01270 | 0.10994 | 0.11688 | 0.00030  | 0.00469  | 0.22941  | 0.10748 |
| <b>Cd</b>   | 0.09960 | 0.67010 | 0.24440 | 0.93570 | 0.84610 | 0.19870  | 0.02780  | 0.53990  | 0.83730 |
| <b>Ce</b>   | 0.44906 | 0.10042 | < 2e-16 | 0.01969 | 0.12782 | 0.24665  | 0.00040  | 0.13585  | 0.02273 |
| <b>Co</b>   | 0.98083 | 0.86270 | 0.00000 | 0.01148 | 0.00145 | 0.15336  | 0.81554  | 0.65537  | 0.41483 |
| <b>Cr</b>   | 0.19667 | 0.27387 | < 2e-16 | 0.04294 | 0.00000 | 0.00000  | 0.00001  | 0.00000  | 0.00000 |
| <b>Cs</b>   | 0.03759 | 0.75987 | 0.11959 | 0.00745 | 0.00133 | 0.23901  | 0.00012  | 0.17134  | 0.19077 |
| <b>Cu</b>   | 0.00002 | 0.12518 | 0.00073 | 0.01503 | 0.00000 | 0.00833  | 0.00006  | 0.00015  | 0.00186 |
| <b>Fe57</b> | 0.02883 | 0.14732 | 0.00000 | 0.06325 | 0.00113 | 0.00191  | 0.04129  | 0.05919  | 0.02275 |
| <b>Fe58</b> | 0.19144 | 0.21054 | 0.00027 | 0.19625 | 0.02130 | 0.64051  | 0.44892  | 0.18526  | 0.35275 |
| <b>K</b>    | 0.00455 | 0.00003 | 0.00000 | 0.00000 | 0.00000 | 0.00000  | 0.00000  | 0.00000  | 0.00000 |
| <b>La</b>   | 0.55880 | 0.95670 | < 2e-16 | 0.01840 | 0.14010 | 0.73190  | 0.00002  | 0.22170  | 0.13260 |
| <b>Mg</b>   | 0.00025 | 0.01257 | 0.00000 | 0.12644 | 0.23057 | 0.00001  | 0.00055  | 0.08397  | 0.35158 |
| <b>Mn</b>   | 0.39767 | 0.00720 | 0.00034 | 0.35099 | 0.00796 | 0.12402  | 0.51204  | 0.40223  | 0.82066 |
| <b>Mo</b>   | 0.00000 | 0.00000 | 0.00000 | 0.00000 | 0.38508 | 0.00367  | 0.00000  | 0.00006  | 0.00983 |
| <b>Na</b>   | 0.34680 | 0.42465 | 0.92905 | 0.17733 | 0.01838 | 0.76579  | 0.71973  | 0.63274  | 0.30547 |
| <b>Ni</b>   | 0.93737 | 0.82472 | 0.01483 | 0.84503 | 0.22397 | 0.01282  | 0.02029  | 0.82097  | 0.62581 |
| <b>Pb</b>   | 0.69636 | 0.70775 | 0.00015 | 0.00000 | 0.00003 | 0.02489  | 0.00036  | 0.00000  | 0.00635 |
| <b>P</b>    | 0.02881 | 0.37726 | 0.00070 | 0.00125 | 0.11395 | 0.94635  | 0.00644  | 0.49593  | 0.06773 |
| <b>Pr</b>   | 0.43680 | 0.81410 | < 2e-16 | 0.07720 | 0.17560 | 0.14620  | 0.02570  | 0.10510  | 0.01180 |
| <b>Rb</b>   | 0.01010 | 0.00000 | 0.00000 | 0.00000 | 0.00000 | 0.00000  | 0.00000  | 0.00000  | 0.00000 |
| <b>Sc</b>   | 0.00000 | 0.00002 | < 2e-16 | 0.35116 | 0.00000 | 0.00077  | 0.16275  | 0.00000  | 0.00000 |
| <b>S</b>    | 0.00000 | 0.00000 | 0.00000 | 0.00000 | 0.00000 | 0.00000  | 0.00000  | 0.00000  | 0.00000 |
| <b>Si</b>   | 0.00002 | 0.35449 | 0.12080 | 0.00063 | 0.95197 | 0.00007  | 0.15216  | 0.00488  | 0.00936 |
| <b>Sr</b>   | 0.00069 | 0.77448 | 0.06691 | 0.13699 | 0.34709 | 0.65553  | 0.44288  | 0.30985  | 0.42714 |
| <b>Th</b>   | 0.00004 | 0.15942 | < 2e-16 | 0.34293 | 0.36777 | 0.00022  | 0.88752  | 0.00221  | 0.08107 |
| <b>Ti</b>   | 0.00279 | 0.00002 | < 2e-16 | 0.08275 | 0.00008 | < 2e-16  | 0.02146  | 0.00001  | < 2e-16 |
| <b>U</b>    | 0.00341 | 0.78055 | 0.31615 | 0.00435 | 0.00424 | 0.00008  | 0.00008  | 0.00687  | 0.00394 |
| <b>V</b>    | 0.01148 | 0.00076 | < 2e-16 | 0.00003 | 0.00000 | 0.00000  | 0.00000  | 0.00023  | 0.00002 |
| <b>W182</b> | 0.03763 | 0.00687 | < 2e-16 | 0.00000 | 0.00092 | 0.00000  | 0.01376  | 0.00000  | 0.00000 |
| <b>W184</b> | 0.01471 | 0.00392 | < 2e-16 | 0.00000 | 0.00121 | 0.00000  | 0.01251  | 0.00000  | 0.00000 |
| <b>Y</b>    | 0.65401 | 0.14902 | < 2e-16 | 0.54893 | 0.28799 | 0.97879  | 0.12033  | 0.39477  | 0.05863 |
| <b>Zn</b>   | 0.42535 | 0.45571 | 0.08475 | 0.01379 | 0.25716 | 0.30866  | 0.37813  | 0.99485  | 0.45456 |
| <b>Zr90</b> | 0.00004 | 0.00008 | < 2e-16 | 0.00121 | 0.00050 | 0.00000  | 0.02322  | 0.09618  | 0.04651 |
| <b>Zr91</b> | 0.02507 | 0.00142 | < 2e-16 | 0.12139 | 0.00004 | 0.00000  | 0.51697  | 0.03589  | 0.01288 |

| Element     | Malic   | MSA     | Nonanoic | Oxalic  | Sulfuric | Valeric |
|-------------|---------|---------|----------|---------|----------|---------|
| <b>Al</b>   | 0.00000 | 0.00649 | 0.00543  | 0.08090 | 0.00000  | 0.16805 |
| <b>Ba</b>   | 0.00000 | 0.00014 | < 2e-16  | 0.00000 | < 2e-16  | 0.00000 |
| <b>Ca</b>   | 0.77075 | 0.00000 | 0.01955  | 0.78052 | 0.99813  | 0.42896 |
| <b>Cd</b>   | 0.14440 | 0.01810 | 0.03840  | 0.23950 | 0.15340  | 0.60630 |
| <b>Ce</b>   | 0.00000 | 0.46411 | 0.19270  | 0.34509 | 0.00000  | 0.49900 |
| <b>Co</b>   | 0.00345 | 0.03220 | 0.00717  | 0.00074 | 0.00055  | 0.88410 |
| <b>Cr</b>   | < 2e-16 | 0.00045 | 0.00000  | 0.22486 | < 2e-16  | 0.11181 |
| <b>Cs</b>   | 0.00244 | 0.00040 | 0.67298  | 0.51748 | 0.01584  | 0.00744 |
| <b>Cu</b>   | 0.00075 | 0.01176 | 0.62091  | 0.88561 | 0.22092  | 0.04120 |
| <b>Fe57</b> | 0.00017 | 0.08254 | 0.21143  | 0.03766 | 0.69501  | 0.25026 |
| <b>Fe58</b> | 0.01745 | 0.00000 | 0.10614  | 0.00299 | 0.16400  | 0.39713 |
| <b>K</b>    | 0.00000 | 0.00129 | 0.00013  | 0.16771 | 0.00000  | 0.00000 |
| <b>La</b>   | 0.00000 | 0.49520 | 0.22910  | 0.47130 | 0.00000  | 0.49400 |
| <b>Mg</b>   | 0.00031 | 0.00000 | 0.00000  | 0.00010 | 0.00000  | 0.00021 |
| <b>Mn</b>   | 0.10537 | 0.00001 | 0.05683  | 0.00101 | 0.00344  | 0.42127 |
| <b>Mo</b>   | 0.00024 | 0.00000 | 0.00000  | 0.00000 | 0.47369  | 0.00000 |
| <b>Na</b>   | 0.16976 | 0.67190 | 0.07229  | 0.52271 | 0.60918  | 0.43425 |
| <b>Ni</b>   | 0.22085 | 0.00015 | 0.05895  | 0.00710 | 0.06466  | 0.57586 |
| <b>Pb</b>   | 0.00001 | 0.61314 | 0.00362  | 0.21109 | 0.03501  | 0.80602 |
| <b>P</b>    | 0.10001 | 0.13105 | 0.04366  | 0.80005 | 0.02001  | 0.18205 |
| <b>Pr</b>   | 0.00000 | 0.12690 | 0.19500  | 0.30610 | 0.00000  | 0.50470 |
| <b>Rb</b>   | 0.00000 | 0.00001 | 0.00005  | 0.01130 | 0.00000  | 0.00000 |
| <b>Sc</b>   | < 2e-16 | < 2e-16 | < 2e-16  | < 2e-16 | < 2e-16  | 0.00018 |
| <b>S</b>    | 0.00000 | 0.06745 | 0.00000  | 0.00000 | 0.00000  | 0.00000 |
| <b>Si</b>   | 0.67169 | 0.00060 | 0.00000  | 0.00001 | 0.57592  | 0.00000 |
| <b>Sr</b>   | 0.23690 | 0.29740 | 0.03802  | 0.45556 | 0.00028  | 0.00497 |
| <b>Th</b>   | < 2e-16 | 0.24201 | 0.00013  | 0.05897 | < 2e-16  | 0.00005 |
| <b>Ti</b>   | < 2e-16 | 0.90102 | 0.00000  | 0.00004 | < 2e-16  | 0.00000 |
| <b>U</b>    | 0.91468 | 0.87330 | < 2e-16  | 0.00000 | 0.24958  | 0.00000 |
| <b>V</b>    | 0.00000 | 0.00496 | 0.00000  | 0.00002 | < 2e-16  | 0.00000 |
| <b>W182</b> | < 2e-16 | 0.03138 | 0.00478  | 0.00963 | 0.00000  | 0.05737 |
| <b>W184</b> | < 2e-16 | 0.02576 | 0.00109  | 0.02768 | 0.00000  | 0.00721 |
| <b>Y</b>    | 0.00000 | 0.00593 | 0.01110  | 0.87057 | 0.00000  | 0.04839 |
| <b>Zn</b>   | 0.02664 | 0.73364 | 0.48768  | 0.01003 | 0.66783  | 0.13318 |
| <b>Zr90</b> | < 2e-16 | 0.00680 | 0.00000  | 0.02039 | < 2e-16  | 0.01763 |
| <b>Zr91</b> | < 2e-16 | 0.00507 | 0.00003  | 0.06708 | < 2e-16  | 0.40442 |

**Supplementary Table S4.** Adjusted  $R^2$  values for Model 2.

| ELEMENT | <i>RQ2</i>            | <i>RQ3</i>            |
|---------|-----------------------|-----------------------|
|         | Adjusted $R^2$ Values | Adjusted $R^2$ Values |
| Mg      | 0.82                  | 0.872                 |
| Si      | 0.67                  | 0.6713                |
| Al      | 0.95                  | 0.9536                |
| Ba      | 0.5                   | 0.5023                |
| Ca      | 0.67                  | 0.6656                |
| Cd      | 0.53                  | 0.5283                |
| Ce      | 0.56                  | 0.5579                |
| Co      | 0.76                  | 0.7648                |
| Cr      | 0.63                  | 0.6275                |
| Cs      | 0.65                  | 0.6459                |
| Cu      | 0.51                  | 0.5142                |
| Fe57*   | 0.36                  | 0.3645                |
| Fe58    | 0.85                  | 0.8478                |
| K       | 0.3                   | 0.3021                |
| La      | 0.53                  | 0.5285                |
| Mn      | 0.89                  | 0.8872                |
| Mo      | 0.65                  | 0.647                 |
| Na      | 0.16                  | 0.1586                |
| Ni      | 0.88                  | 0.8757                |
| Pb      | 0.26                  | 0.2589                |
| P       | 0.26                  | 0.2637                |
| Pr      | 0.57                  | 0.5701                |
| Rb      | 0.51                  | 0.5106                |
| Sc      | 0.76                  | 0.7602                |
| S       | 0.91                  | 0.912                 |
| Sr      | 0.77                  | 0.7686                |
| Th      | 0.74                  | 0.7447                |
| Ti      | 0.77                  | 0.7706                |
| U       | 0.5                   | 0.502                 |
| V       | 0.7                   | 0.6972                |
| W182    | 0.67                  | 0.6707                |
| W184    | 0.67                  | 0.6727                |
| Y       | 0.63                  | 0.6293                |
| Zn      | 0.14                  | 0.1374                |
| Zr90    | 0.67                  | 0.6688                |
| Zr91    | 0.66                  | 0.6644                |

**Supplementary Table S5.** All experimental data, stability constants, and conditions for stability constant analysis.

| Experiment number | Acid Name | Metal | $M (M)$               | $R$  | Log $k$ | Temp (°C) | Ionic Strength |
|-------------------|-----------|-------|-----------------------|------|---------|-----------|----------------|
| 162               | Acetic    | Ca    | $5.08 \times 10^{-5}$ | 0.93 | 1.18    | 25        | 0.0            |
| 216               | Citric    | Ca    | $1.45 \times 10^{-4}$ | 2.65 | 4.85    | 25        | 0.0            |
| 198               | Formic    | Ca    | $4.74 \times 10^{-5}$ | 0.86 | 1.43    | 25        | 0.0            |
| 180               | Fumaric   | Ca    | $5.72 \times 10^{-5}$ | 1.04 | 2       | 25        | 0.0            |
| 207               | Gluconic  | Ca    | $4.50 \times 10^{-5}$ | 0.82 | 1.21    | 25        | 0.1            |
| 189               | Glutamic  | Ca    | $4.73 \times 10^{-5}$ | 0.86 | 2.06    | 25        | 0.0            |
| 252               | Glycolic  | Ca    | $6.00 \times 10^{-5}$ | 1.09 | 1.62    | 25        | 0.0            |
| 225               | Lactic    | Ca    | $5.77 \times 10^{-5}$ | 1.05 | 1.48    | 25        | 0.0            |
| 234               | Malic     | Ca    | $1.03 \times 10^{-4}$ | 1.88 | 2.72    | 25        | 0.0            |
| 279               | Nitric    | Ca    | $5.48 \times 10^{-5}$ | 1.00 | 0.5     | 25        | 0.0            |
| 261               | Oxalic    | Ca    | $8.68 \times 10^{-5}$ | 1.58 | 3.19    | 25        | 0.0            |
| 171               | Sulfuric  | Ca    | $1.06 \times 10^{-4}$ | 1.93 | 2.36    | 25        | 0.0            |
| 270               | AIB       | Cu    | $4.64 \times 10^{-6}$ | 3.39 | 8.26    | 25        | 0.1            |
| 162               | Acetic    | Cu    | $1.88 \times 10^{-6}$ | 1.38 | 1.79    | 25        | 0.1            |
| 216               | Citric    | Cu    | $5.55 \times 10^{-6}$ | 4.05 | 3.9     | 25        | 0.1            |
| 198               | Formic    | Cu    | $1.56 \times 10^{-6}$ | 1.14 | 1.61    | 25        | 0.1            |
| 180               | Fumaric   | Cu    | $5.99 \times 10^{-6}$ | 4.37 | 2.51    | 25        | 0.0            |
| 207               | Gluconic  | Cu    | $5.47 \times 10^{-6}$ | 3.99 | 2.51    | 25        | 0.1            |
| 189               | Glutamic  | Cu    | $3.90 \times 10^{-6}$ | 2.85 | 8.32    | 25        | 0.1            |
| 252               | Glycolic  | Cu    | $6.93 \times 10^{-6}$ | 5.06 | 2.4     | 25        | 0.1            |
| 225               | Lactic    | Cu    | $4.63 \times 10^{-6}$ | 3.38 | 3.02    | 25        | 0.0            |
| 234               | Malic     | Cu    | $5.13 \times 10^{-6}$ | 3.75 | 3.63    | 25        | 0.1            |
| 279               | Nitric    | Cu    | $1.37 \times 10^{-6}$ | 1.00 | 0.5     | 25        | 0.0            |
| 261               | Oxalic    | Cu    | $1.94 \times 10^{-6}$ | 1.42 | 4.85    | 25        | 0.1            |
| 171               | Sulfuric  | Cu    | $8.08 \times 10^{-7}$ | 0.59 | 1.26    | 25        | 0.1            |
| 288               | Valeric   | Cu    | $3.17 \times 10^{-6}$ | 2.31 | 2.12    | 25        | 0.0            |
| 162               | Acetic    | K     | $2.32 \times 10^{-4}$ | 0.09 | -0.27   | 25        | 0.0            |
| 216               | Citric    | K     | $4.77 \times 10^{-5}$ | 0.02 | 1.17    | 25        | 0.0            |
| 234               | Malic     | K     | $7.54 \times 10^{-5}$ | 0.03 | 0.43    | 25        | 0.0            |
| 279               | Nitric    | K     | $2.48 \times 10^{-3}$ | 1.00 | -0.19   | 25        | 0.0            |
| 261               | Oxalic    | K     | $1.15 \times 10^{-4}$ | 0.05 | 0.8     | 25        | 0.0            |
| 171               | Sulfuric  | K     | $1.38 \times 10^{-2}$ | 5.59 | 0.85    | 25        | 0.0            |
| 162               | Acetic    | Mg    | $5.83 \times 10^{-4}$ | 1.03 | 1.26    | 25        | 0.0            |
| 216               | Citric    | Mg    | $5.35 \times 10^{-3}$ | 9.45 | 4.86    | 25        | 0.0            |
| 198               | Formic    | Mg    | $5.23 \times 10^{-4}$ | 0.93 | 1.43    | 25        | 0.0            |
| 207               | Gluconic  | Mg    | $7.67 \times 10^{-4}$ | 1.36 | 0.70    | 25        | 0.1            |



| Experiment number | Acid Name | Metal | $M (M)$               | $R$  | Log k | Temp (°C) | Ionic Strength |
|-------------------|-----------|-------|-----------------------|------|-------|-----------|----------------|
| 189               | Glutamic  | Mg    | $4.37 \times 10^{-4}$ | 0.77 | 1.9   | 25        | 0.1            |
| 252               | Glycolic  | Mg    | $7.87 \times 10^{-4}$ | 1.39 | 1.33  | 25        | 0.0            |
| 225               | Lactic    | Mg    | $8.54 \times 10^{-4}$ | 1.51 | 1.37  | 25        | 0.0            |
| 234               | Malic     | Mg    | $2.73 \times 10^{-3}$ | 4.82 | 1.71  | 25        | 0.1            |
| 279               | Nitric    | Mg    | $5.48 \times 10^{-5}$ | 1.00 | NA    | NA        | NA             |
| 261               | Oxalic    | Mg    | $3.00 \times 10^{-3}$ | 5.30 | 2.76  | 20        | 0.1            |
| 171               | Sulfuric  | Mg    | $1.35 \times 10^{-3}$ | 2.39 | 2.26  | 25        | 0.0            |
| 162               | Acetic    | Mn    | $1.69 \times 10^{-5}$ | 1.13 | 1.4   | 25        | 0.0            |
| 216               | Citric    | Mn    | $2.17 \times 10^{-5}$ | 1.45 | 4.15  | 25        | 0.1            |
| 180               | Fumaric   | Mn    | $1.78 \times 10^{-5}$ | 1.19 | 0.99  | 25        | 0.1            |
| 252               | Glycolic  | Mn    | $1.40 \times 10^{-5}$ | 0.94 | 1.58  | 25        | 0.0            |
| 225               | Lactic    | Mn    | $1.30 \times 10^{-5}$ | 0.87 | 1.73  | 25        | 0.0            |
| 234               | Malic     | Mn    | $1.83 \times 10^{-5}$ | 1.22 | 2.24  | 25        | 0.1            |
| 279               | Nitric    | Mn    | $1.50 \times 10^{-5}$ | 1.00 | 0.2   | 25        | 0.0            |
| 261               | Oxalic    | Mn    | $1.39 \times 10^{-5}$ | 0.93 | 3.95  | 25        | 0.0            |
| 171               | Sulfuric  | Mn    | $2.59 \times 10^{-5}$ | 1.73 | 2.25  | 25        | 0.0            |
| 270               | AIB       | Ni    | $7.31 \times 10^{-5}$ | 1.24 | 2.12  | 25        | 0.5            |
| 162               | Acetic    | Ni    | $6.22 \times 10^{-5}$ | 1.06 | 0.88  | 25        | 0.1            |
| 216               | Citric    | Ni    | $2.01 \times 10^{-5}$ | 0.34 | 5.32  | 25        | 0.1            |
| 207               | Gluconic  | Ni    | $6.39 \times 10^{-5}$ | 1.08 | 1.82  | 25        | 0.1            |
| 189               | Glutamic  | Ni    | $6.62 \times 10^{-5}$ | 1.12 | 5.61  | 25        | 0.1            |
| 252               | Glycolic  | Ni    | $7.31 \times 10^{-5}$ | 1.24 | 2.26  | 25        | 0.0            |
| 225               | Lactic    | Ni    | $6.30 \times 10^{-5}$ | 1.07 | 2.2   | 25        | 0.0            |
| 234               | Malic     | Ni    | $6.52 \times 10^{-5}$ | 1.11 | 3.17  | 20        | 0.1            |
| 279               | Nitric    | Ni    | $5.89 \times 10^{-5}$ | 1.00 | 0.4   | 25        | 0.0            |
| 261               | Oxalic    | Ni    | $4.55 \times 10^{-5}$ | 0.77 | 4.16  | 25        | 0.1            |
| 171               | Sulfuric  | Ni    | $7.20 \times 10^{-5}$ | 1.22 | 1     | 25        | 0.1            |

**Supplementary Table S6.** Parameter estimates and  $R^2$  values for individual regressions.

| Element | Parameter estimate      | R2             |
|---------|-------------------------|----------------|
| Ca      | $y = 0.4872x + 0.2181$  | $R^2 = 0.8898$ |
| Mg      | $y = 2.3242x - 1.6777$  | $R^2 = 0.8358$ |
| Ni      | $y = -0.0916x + 1.2654$ | $R^2 = 0.2942$ |
| Mn      | $y = 0.0491x + 0.9919$  | $R^2 = 0.0897$ |
| Cu      | $y = 0.0288x + 2.9826$  | $R^2 = 0.0027$ |
| K       | $y = -0.0475x + 0.0727$ | $R^2 = 0.7887$ |
